# Supplementary material for: Tumor innervation in cervical cancer: More is worse
Source: Research Square preprint supplement (doi:10.21203/rs.3.rs-5262935/v1), 2024-10-29
Supplement: Supplementary file 1 [file 8658382464d055b0b7371aca.xlsx]

## Sheet: Sheet1
sample	time	status	riskscore	grade	stage	type
TCGA-2W-A8YY	1.46027	0	0.51769	g3	stage ib2	Adenosquamous
TCGA-4J-AA1J	1.48493	0	0.0990517	g3	stage ib2	Squamous carcinoma
TCGA-BI-A0VR	4.12329	0	-0.372317	g3	stage iiib	Squamous carcinoma
TCGA-BI-A0VS	4.75342	0	-0.0419276	g3	stage ib	Squamous carcinoma
TCGA-BI-A20A	1.9726	0	-0.326056	g3	stage ib1	Squamous carcinoma
TCGA-C5-A0TN	0.953425	1	0.351612	g3	stage ib2	Squamous carcinoma
TCGA-C5-A1BE	5.73699	1	0.0966507	g2	stage ib2	Squamous carcinoma
TCGA-C5-A1BF	1.56164	1	0.229993	g1	stage ib	Squamous carcinoma
TCGA-C5-A1BI	3.04658	0	-0.196334	g2	stage iiib	Squamous carcinoma
TCGA-C5-A1BJ	12.0137	0	-0.295343	g2	stage iib	Squamous carcinoma
TCGA-C5-A1BK	14.7534	0	-0.557406	g2	stage ib	Squamous carcinoma
TCGA-C5-A1BL	14.4411	0	-0.233058	g2	stage ib	Squamous carcinoma
TCGA-C5-A1BM	6.90411	1	0.0903603	g2	stage ib	Squamous carcinoma
TCGA-C5-A1BN	0.454795	1	0.380775	g3	stage ib2	Squamous carcinoma
TCGA-C5-A1BQ	1.65479	1	0.418074	g2	stage iiib	Squamous carcinoma
TCGA-C5-A1M5	5.62192	1	-0.148567	g2	stage ib	Squamous carcinoma
TCGA-C5-A1M6	2.61644	1	0.0805853	g3	stage iib	Squamous carcinoma
TCGA-C5-A1M7	3.86027	0	0.155165	g2	stage ib	Squamous carcinoma
TCGA-C5-A1M8	2.51781	0	-0.0203217	g2	stage ib1	Squamous carcinoma
TCGA-C5-A1M9	2.91781	1	0.63575	g3	stage ib1	Adenocarcinoma
TCGA-C5-A1ME	4.81096	0	-0.203789	g1	stage ib1	Adenocarcinoma
TCGA-C5-A1MF	4.43014	0	-0.260418	g2	stage ib2	Squamous carcinoma
TCGA-C5-A1MH	3.24932	1	0.295414	g3	stage iiib	Squamous carcinoma
TCGA-C5-A1MI	2.96712	1	-0.365521	g2	stage ib1	Squamous carcinoma
TCGA-C5-A1MJ	0.0383562	1	-0.204287	g2	stage ib1	Adenocarcinoma
TCGA-C5-A1MK	0.20274	1	0.616176	g3	stage iiib	Squamous carcinoma
TCGA-C5-A1ML	1.74247	1	0.578576	g3	stage ib2	Squamous carcinoma
TCGA-C5-A1MN	3.41096	1	0.83354	g2	stage iiib	Squamous carcinoma
TCGA-C5-A1MP	0.29863	0	-0.117295	g3	stage ib2	Squamous carcinoma
TCGA-C5-A1MQ	2.82466	0	-0.314363	g2	stage iia	Squamous carcinoma
TCGA-C5-A2LS	3.68493	0	-0.0110822	g1	stage ib2	Adenocarcinoma
TCGA-C5-A2LT	6.09863	0	0.449107	g3	stage ib	Squamous carcinoma
TCGA-C5-A2LV	6.12055	0	0.0794822	g3	stage ib	Squamous carcinoma
TCGA-C5-A2LX	6.92055	0	-0.256442	g2	stage ib1	Squamous carcinoma
TCGA-C5-A2LY	6.52877	0	0.00972255	g2	stage ib1	Squamous carcinoma
TCGA-C5-A2LZ	8.34521	1	-0.0440056	g2	stage iiib	Squamous carcinoma
TCGA-C5-A2M1	3.20274	0	-0.269377	g2	stage ib1	Adenocarcinoma
TCGA-C5-A2M2	2.76986	1	0.169294	g2	stage ib2	Adenocarcinoma
TCGA-C5-A3HD	4.33425	0	0.187892	g2	stage iib	Squamous carcinoma
TCGA-C5-A3HE	1.50137	0	-0.231269	g3	stage ib2	Squamous carcinoma
TCGA-C5-A3HF	1.48767	1	0.238184	g2	stage ib2	Adenocarcinoma
TCGA-C5-A3HL	1.70137	0	0.182677	g2	stage ib2	Squamous carcinoma
TCGA-C5-A7CG	17.5562	0	-0.485608	g2	stage ib	Squamous carcinoma
TCGA-C5-A7CH	12.8603	0	1.03855	g2	stage iib	Squamous carcinoma
TCGA-C5-A7CJ	8.48493	1	-0.195625	g2	stage iia	Squamous carcinoma
TCGA-C5-A7CK	11.1945	1	0.577778	g2	stage iva	Squamous carcinoma
TCGA-C5-A7CL	1.29041	1	0.5156	g2	stage iiib	Squamous carcinoma
TCGA-C5-A7CM	1.69589	0	0.715139	g2	stage ib2	Adenocarcinoma
TCGA-C5-A7CO	12.2795	0	0.0300843	g2	stage ib2	Squamous carcinoma
TCGA-C5-A7UC	1.43288	1	0.946135	g3	stage ib	Squamous carcinoma
TCGA-C5-A7UE	12.9808	0	0.128585	g2	stage ib1	Squamous carcinoma
TCGA-C5-A7UH	10.926	0	-0.45454	g3	stage iiib	Squamous carcinoma
TCGA-C5-A7UI	7.91233	1	0.105154	g3	stage ib1	Squamous carcinoma
TCGA-C5-A7X3	0.778082	1	0.133915	g2	stage iiib	Squamous carcinoma
TCGA-C5-A7X5	1.13425	1	0.843245	g3	stage ivb	Squamous carcinoma
TCGA-C5-A7X8	0.227397	0	0.00114276	g2	stage ib1	Adenocarcinoma
TCGA-C5-A7XC	4.24932	0	-0.207728	g2	stage ib1	Squamous carcinoma
TCGA-C5-A8XH	3.81918	1	0.218336	NA	stage ib1	Squamous carcinoma
TCGA-C5-A8XI	0.69589	0	0.096389	g3	stage ib2	Squamous carcinoma
TCGA-C5-A8XJ	12.2384	0	0.133253	NA	stage ib	Squamous carcinoma
TCGA-C5-A8XK	8.32603	0	0.405368	g3	NA	Squamous carcinoma
TCGA-C5-A8YQ	1.9589	1	0.441873	g2	stage ib1	Squamous carcinoma
TCGA-C5-A8YR	2.29315	1	1.04624	g3	stage ib	Squamous carcinoma
TCGA-C5-A8YT	1.73425	1	-0.0221096	g3	stage ib1	Squamous carcinoma
TCGA-C5-A8ZZ	1.74247	0	-0.143619	g2	stage iib	Squamous carcinoma
TCGA-C5-A901	1.41918	0	0.52216	g2	NA	Squamous carcinoma
TCGA-C5-A902	0.408219	0	0.458556	g3	stage ib2	Squamous carcinoma
TCGA-C5-A905	13.3671	0	-0.0362543	g2	stage ib	Squamous carcinoma
TCGA-C5-A907	1.2274	0	1.04664	g2	stage ib2	Squamous carcinoma
TCGA-DG-A2KH	0.0931507	0	0.39891	gx	stage ib1	Adenosquamous
TCGA-DG-A2KJ	7.92603	0	-0.0553323	g3	stage iiib	Squamous carcinoma
TCGA-DG-A2KK	6.83836	0	0.17106	g3	stage iiib	Squamous carcinoma
TCGA-DG-A2KL	3.74521	0	-0.0911023	g1	stage iia	Squamous carcinoma
TCGA-DG-A2KM	5.33151	0	-0.880467	g2	stage ib1	Squamous carcinoma
TCGA-DR-A0ZL	7.31233	0	-0.121086	g3	stage ib	Squamous carcinoma
TCGA-DR-A0ZM	4.90685	0	-0.120658	g2	stage iiib	Squamous carcinoma
TCGA-DS-A0VK	3.06301	1	-0.259702	g3	stage ib	Squamous carcinoma
TCGA-DS-A0VL	4.63562	1	-0.126498	g2	stage ib	Squamous carcinoma
TCGA-DS-A0VM	9.83288	0	0.0464794	g3	stage ib	Squamous carcinoma
TCGA-DS-A0VN	9.88767	0	0.086245	g2	stage ib	Squamous carcinoma
TCGA-DS-A1O9	0.728767	1	0.8361	g3	stage iva	Squamous carcinoma
TCGA-DS-A1OA	2.40822	1	0.321973	g3	stage ib	Squamous carcinoma
TCGA-DS-A1OB	2.3589	1	0.722858	g2	stage ib	Squamous carcinoma
TCGA-DS-A1OC	1.03014	0	0.185535	g2	stage ib	Squamous carcinoma
TCGA-DS-A1OD	10.6137	0	-0.566754	g3	stage ib1	Squamous carcinoma
TCGA-DS-A3LQ	1.91507	0	-0.59308	g3	stage iiib	Squamous carcinoma
TCGA-DS-A5RQ	1.40274	0	-0.209478	g2	stage ib1	Squamous carcinoma
TCGA-DS-A7WF	1.34795	1	0.450515	g3	stage ib2	Adenosquamous
TCGA-DS-A7WH	1.46027	0	0.500734	g2	stage ib1	Adenocarcinoma
TCGA-DS-A7WI	0.690411	1	0.50548	g2	stage iia2	Squamous carcinoma
TCGA-EA-A1QS	3.29589	0	0.250707	g2	stage ib1	Squamous carcinoma
TCGA-EA-A1QT	3.40548	0	-0.380126	g2	stage ib	Squamous carcinoma
TCGA-EA-A3HQ	3.11233	0	-0.249902	g2	stage ii	Squamous carcinoma
TCGA-EA-A3HR	2.57534	0	0.0677746	g2	stage ii	Squamous carcinoma
TCGA-EA-A3HS	2.6274	0	0.196422	g1	stage ib	Squamous carcinoma
TCGA-EA-A3HT	2.6137	0	0.27354	g1	stage ib	Squamous carcinoma
TCGA-EA-A3HU	2.77534	0	0.309519	g2	stage ii	Squamous carcinoma
TCGA-EA-A3QD	1.08767	0	-0.235672	g3	stage iiib	Squamous carcinoma
TCGA-EA-A3QE	2.08493	0	-0.156656	g2	stage ib	Squamous carcinoma
TCGA-EA-A3Y4	3.07397	0	0.345646	g3	stage ib	Squamous carcinoma
TCGA-EA-A410	2.2	0	0.0267895	g2	stage iia2	Squamous carcinoma
TCGA-EA-A411	2.04658	0	-0.083136	g2	stage ib1	Squamous carcinoma
TCGA-EA-A439	2.64384	0	-0.250277	g3	stage iia1	Squamous carcinoma
TCGA-EA-A43B	2.16712	0	-0.00671676	g2	stage ib1	Squamous carcinoma
TCGA-EA-A44S	1.01096	0	-0.15533	g2	stage iiib	Squamous carcinoma
TCGA-EA-A4BA	2.06849	0	0.448533	g2	stage ib2	Adenocarcinoma
TCGA-EA-A50E	0.621918	1	-0.0848205	g2	stage iva	Squamous carcinoma
TCGA-EA-A556	1.2411	0	-0.0492143	g3	stage ib1	Adenocarcinoma
TCGA-EA-A5FO	2.23288	0	0.235397	g2	stage ib1	Squamous carcinoma
TCGA-EA-A5O9	2.1589	0	0.0175194	g2	stage ib2	Squamous carcinoma
TCGA-EA-A5ZD	2.27397	0	0.268229	g2	stage ib1	Squamous carcinoma
TCGA-EA-A5ZE	2.27123	0	-0.303236	g3	stage ib1	Squamous carcinoma
TCGA-EA-A5ZF	2.26849	0	-0.105034	g2	stage ib1	Squamous carcinoma
TCGA-EA-A6QX	2	0	0.136451	g3	stage iiib	Squamous carcinoma
TCGA-EA-A78R	1.12329	0	-0.0773679	g2	stage ib1	Squamous carcinoma
TCGA-EA-A97N	0.030137	0	0.807091	g2	stage ib2	Squamous carcinoma
TCGA-EK-A2GZ	1.04932	0	0.0189073	g2	stage iiib	Squamous carcinoma
TCGA-EK-A2H0	5.06027	0	0.264587	g3	stage iib	Squamous carcinoma
TCGA-EK-A2H1	2.18904	0	0.069889	g3	stage ib2	Squamous carcinoma
TCGA-EK-A2IP	0.553425	0	0.515712	g3	stage ib1	Squamous carcinoma
TCGA-EK-A2IR	9.43014	0	-0.184829	g3	stage ib2	Squamous carcinoma
TCGA-EK-A2PG	0.126027	0	0.668628	g3	NA	Squamous carcinoma
TCGA-EK-A2PI	1.60548	0	0.28346	g2	stage iiib	Squamous carcinoma
TCGA-EK-A2PK	0.0328767	0	0.157737	g3	stage ib1	Squamous carcinoma
TCGA-EK-A2PL	0.0356164	0	0.724388	NA	stage iiib	Squamous carcinoma
TCGA-EK-A2PM	0.0493151	0	0.417634	g3	stage iib	Squamous carcinoma
TCGA-EK-A2R7	0.0739726	0	-0.311139	g3	stage ib	Squamous carcinoma
TCGA-EK-A2R8	0.120548	0	0.791509	g3	stage ib2	Squamous carcinoma
TCGA-EK-A2R9	0.0109589	0	-0.209986	g3	stage ib1	Squamous carcinoma
TCGA-EK-A2RA	3.4137	0	0.0223387	g3	stage iia2	Squamous carcinoma
TCGA-EK-A2RB	0.0246575	0	0.466753	g3	stage ivb	Squamous carcinoma
TCGA-EK-A2RC	0.353425	0	-0.0720833	g3	stage ib1	Squamous carcinoma
TCGA-EK-A2RE	0.156164	0	1.03025	g2	stage iia	Squamous carcinoma
TCGA-EK-A2RJ	0.145205	0	0.221171	g3	stage ib2	Squamous carcinoma
TCGA-EK-A2RK	0.0356164	0	-0.11442	g3	stage ia2	Squamous carcinoma
TCGA-EK-A2RL	3.98082	1	0.372052	g2	stage ib	Adenocarcinoma
TCGA-EK-A2RM	0.136986	0	-0.0445135	g3	stage ib	Squamous carcinoma
TCGA-EK-A2RN	0.194521	0	0.335446	g2	stage ib1	Squamous carcinoma
TCGA-EK-A2RO	0.00547945	0	0.107177	g1	stage iib	Squamous carcinoma
TCGA-EK-A3GJ	0.00821918	0	-0.0577986	g3	stage ib1	Squamous carcinoma
TCGA-EK-A3GK	0.0410959	0	0.202971	g3	stage ib1	Adenocarcinoma
TCGA-EK-A3GM	0	0	0.379685	g2	stage iia	Adenocarcinoma
TCGA-EK-A3GN	0.0739726	0	0.53112	g3	stage iiib	Squamous carcinoma
TCGA-EX-A1H5	1.69589	0	-0.15732	g3	stage iib	Squamous carcinoma
TCGA-EX-A1H6	0.660274	0	-0.114858	g1	stage ib1	Adenocarcinoma
TCGA-EX-A3L1	1.26849	0	-0.0784141	g3	stage iia1	Squamous carcinoma
TCGA-EX-A449	1.22466	0	0.0499668	g1	stage ivb	Adenocarcinoma
TCGA-EX-A69L	1.64932	0	-0.341782	g3	stage ib1	Squamous carcinoma
TCGA-EX-A69M	0.693151	1	-0.121522	g3	stage ib2	Squamous carcinoma
TCGA-EX-A8YF	1.29589	0	-0.0552121	g3	stage ib1	Squamous carcinoma
TCGA-FU-A23K	1.01918	0	-0.48091	g3	stage iiib	Squamous carcinoma
TCGA-FU-A23L	1.9863	0	-0.5506	g3	stage iia1	Squamous carcinoma
TCGA-FU-A2QG	1.5863	0	0.155112	g2	stage ib1	Squamous carcinoma
TCGA-FU-A3EO	1.34247	0	-0.267583	g2	stage iib	Adenocarcinoma
TCGA-FU-A3HY	2.6137	0	0.00516601	g2	stage ib2	Squamous carcinoma
TCGA-FU-A3HZ	3.02192	0	-0.154229	g3	stage iia2	Squamous carcinoma
TCGA-FU-A3NI	1.74795	1	-0.327463	g2	stage ib1	Squamous carcinoma
TCGA-FU-A3TQ	2.17808	0	0.490515	g2	stage iiib	Squamous carcinoma
TCGA-FU-A3TX	0.123288	0	0.215831	g3	stage ib2	Squamous carcinoma
TCGA-FU-A3WB	1.34521	0	-0.0296712	g2	stage iia2	Squamous carcinoma
TCGA-FU-A3YQ	2.3589	0	-0.0144611	g1	stage ib1	Squamous carcinoma
TCGA-FU-A40J	1.16712	0	-0.321348	g3	stage iiib	Adenocarcinoma
TCGA-FU-A57G	2.95342	0	-0.0070928	g2	stage ib2	Adenocarcinoma
TCGA-FU-A5XV	0.879452	0	0.210415	g3	stage iiib	Squamous carcinoma
TCGA-FU-A770	0.0931507	0	-0.196997	g2	stage iiib	Adenocarcinoma
TCGA-GH-A9DA	1.47945	0	0.196192	g3	stage ib1	Squamous carcinoma
TCGA-HG-A2PA	2.11781	1	-0.0602876	g2	stage ib2	Squamous carcinoma
TCGA-HM-A3JJ	1.80548	1	-0.122865	g3	stage ib1	Squamous carcinoma
TCGA-HM-A3JK	1.73151	0	-0.15091	g3	stage iia2	Squamous carcinoma
TCGA-HM-A4S6	1.24384	0	0.169001	g3	stage iiib	Squamous carcinoma
TCGA-HM-A6W2	0.786301	0	0.174912	g3	stage ivb	Adenosquamous
TCGA-IR-A3L7	12.2822	0	-0.16605	g3	stage ib1	Squamous carcinoma
TCGA-IR-A3LA	11.4301	0	-0.19972	g3	stage ib1	Adenocarcinoma
TCGA-IR-A3LB	5.56712	1	0.347173	g3	stage ib1	Adenocarcinoma
TCGA-IR-A3LC	10.7808	0	-0.203314	g3	stage ib1	Squamous carcinoma
TCGA-IR-A3LF	8.07945	0	-0.0634911	g2	stage ib1	Adenocarcinoma
TCGA-IR-A3LH	6.5589	0	-0.292836	g4	stage iia1	Squamous carcinoma
TCGA-IR-A3LI	6.83014	0	0.12057	g2	stage ivb	Adenocarcinoma
TCGA-IR-A3LK	2.48767	1	-0.046007	g3	stage ib2	Squamous carcinoma
TCGA-IR-A3LL	3.03014	0	-0.417684	g2	stage ib1	Squamous carcinoma
TCGA-JW-A5VG	2.28493	0	0.213138	g3	stage iia	Squamous carcinoma
TCGA-JW-A5VH	0.273973	1	0.51169	g2	stage ivb	Squamous carcinoma
TCGA-JW-A5VI	2.04658	0	0.0054774	g3	stage iib	Squamous carcinoma
TCGA-JW-A5VJ	1.7863	0	0.171644	g3	stage iib	Squamous carcinoma
TCGA-JW-A5VK	1.70685	0	0.0345484	g3	stage ib2	Squamous carcinoma
TCGA-JW-A5VL	1.29863	0	-0.199197	g1	stage ib2	Squamous carcinoma
TCGA-JW-A69B	2.36438	0	-0.630531	gx	stage ib2	Adenocarcinoma
TCGA-JW-A852	0.690411	1	0.208036	g2	stage iib	Squamous carcinoma
TCGA-JW-AAVH	1.51233	0	0.294563	g2	stage ib1	Squamous carcinoma
TCGA-JX-A3PZ	1.7589	1	0.387155	g2	stage ib	Squamous carcinoma
TCGA-JX-A3Q0	17.4658	0	0.35385	g2	stage iii	Squamous carcinoma
TCGA-JX-A3Q8	3.71781	0	-0.242523	g3	stage ib1	Adenocarcinoma
TCGA-JX-A5QV	1.74247	0	0.0194764	g3	stage ib1	Squamous carcinoma
TCGA-LP-A4AU	0.939726	0	0.852947	g3	stage iiib	Squamous carcinoma
TCGA-LP-A4AV	0	0	-0.229223	g2	stage ib	Squamous carcinoma
TCGA-LP-A4AW	0.0739726	0	-0.0669965	g1	stage ia	Squamous carcinoma
TCGA-LP-A4AX	1.0411	0	-0.125549	g3	stage ib1	Squamous carcinoma
TCGA-LP-A5U2	0.0246575	0	-0.290787	g3	stage iiib	Adenocarcinoma
TCGA-LP-A5U3	0.0684932	0	-0.258451	g3	stage ib1	Squamous carcinoma
TCGA-LP-A7HU	1.11233	0	-0.532943	g3	stage ii	Adenocarcinoma
TCGA-MA-AA3W	1.87671	0	-0.237787	g3	stage ib1	Squamous carcinoma
TCGA-MA-AA3X	1.69041	0	-0.540645	g2	stage iiib	Squamous carcinoma
TCGA-MA-AA3Y	1.48493	0	0.672763	g3	stage ib1	Squamous carcinoma
TCGA-MA-AA3Z	1.63014	0	0.130694	gx	stage ib2	Squamous carcinoma
TCGA-MA-AA41	0.764384	0	0.991556	g2	stage iib	Squamous carcinoma
TCGA-MA-AA42	0.709589	0	0.00919438	g3	stage iib	Squamous carcinoma
TCGA-MA-AA43	0.947945	0	0.482057	g3	stage iiib	Squamous carcinoma
TCGA-MU-A51Y	2.33973	0	-0.281032	g2	stage iia1	Squamous carcinoma
TCGA-MU-A5YI	2.88493	0	-0.128195	g2	stage ia1	Squamous carcinoma
TCGA-MU-A8JM	1.66301	0	0.352699	g2	stage ib1	Squamous carcinoma
TCGA-MY-A5BD	4.56712	0	-0.314329	g1	stage iib	Squamous carcinoma
TCGA-MY-A5BE	2.92055	0	-0.957475	g3	stage ib1	Squamous carcinoma
TCGA-MY-A5BF	1.73699	0	0.337936	g1	stage iia2	Squamous carcinoma
TCGA-MY-A913	1.43562	0	0.378688	g3	stage iia	Squamous carcinoma
TCGA-PN-A8MA	0.246575	0	-0.177275	g3	stage iib	Squamous carcinoma
TCGA-Q1-A5R1	1.29863	0	-0.154851	g2	stage ib1	Adenocarcinoma
TCGA-Q1-A5R2	1.36712	0	-0.183786	g3	NA	Squamous carcinoma
TCGA-Q1-A5R3	1.32877	0	-0.0981374	g2	NA	Squamous carcinoma
TCGA-Q1-A6DT	0.753425	1	0.562338	gx	stage i	Squamous carcinoma
TCGA-Q1-A6DV	1.34521	0	0.729778	g2	stage ib1	Adenocarcinoma
TCGA-Q1-A6DW	1.46301	0	0.215208	gx	stage i	Squamous carcinoma
TCGA-Q1-A73O	1.1726	0	0.632511	gx	stage ib2	Squamous carcinoma
TCGA-Q1-A73P	1.32329	0	-0.443466	g1	stage ib1	Adenocarcinoma
TCGA-Q1-A73Q	0.778082	0	0.136715	gx	stage i	Squamous carcinoma
TCGA-Q1-A73R	1.55342	0	0.144459	gx	stage i	Adenocarcinoma
TCGA-Q1-A73S	1.88493	0	0.227572	g2	stage ib1	Adenosquamous
TCGA-R2-A69V	1.63288	0	-0.6164	g3	stage ib	Squamous carcinoma
TCGA-RA-A741	1.21644	0	-0.228726	gx	stage iib	Squamous carcinoma
TCGA-UC-A7PD	0.972603	1	0.601936	g2	stage ib	Squamous carcinoma
TCGA-UC-A7PF	7.83288	1	-0.124289	g2	stage ib1	Squamous carcinoma
TCGA-UC-A7PG	1.0137	1	1.19015	g1	stage iiib	Squamous carcinoma
TCGA-UC-A7PI	5.79178	0	0.264652	g1	stage ib1	Adenocarcinoma
TCGA-VS-A8EB	0.835616	1	0.732784	gx	stage iiib	Squamous carcinoma
TCGA-VS-A8EC	3.87671	0	0.284136	g2	stage iiib	Squamous carcinoma
TCGA-VS-A8EG	3.79726	0	0.312856	gx	stage ib1	Squamous carcinoma
TCGA-VS-A8EH	2.70137	0	0.423741	g2	stage iiib	Squamous carcinoma
TCGA-VS-A8EI	1.99726	0	0.375267	gx	stage iib	Squamous carcinoma
TCGA-VS-A8EJ	1.66301	1	0.688436	g3	stage iib	Squamous carcinoma
TCGA-VS-A8EK	2.27123	1	0.0826138	g2	stage iva	Squamous carcinoma
TCGA-VS-A8EL	5.45753	0	0.0780202	g3	stage iib	Squamous carcinoma
TCGA-VS-A8Q8	2.67945	1	0.20123	g2	stage ib	Squamous carcinoma
TCGA-VS-A8Q9	4.46575	0	0.212673	g2	stage ib1	Squamous carcinoma
TCGA-VS-A8QA	3.01096	0	0.409402	gx	stage ib1	Squamous carcinoma
TCGA-VS-A8QC	0.958904	1	0.221105	g2	stage iva	Squamous carcinoma
TCGA-VS-A8QF	4.93151	0	0.0851061	g2	stage iib	Squamous carcinoma
TCGA-VS-A8QH	3.31507	1	1.02674	g2	stage ib1	Adenocarcinoma
TCGA-VS-A8QM	2.60548	1	-0.0564999	gx	stage ivb	Squamous carcinoma
TCGA-VS-A94W	3.40548	0	0.184392	g2	stage iib	Squamous carcinoma
TCGA-VS-A94X	1.3863	1	0.671808	g2	stage iib	Squamous carcinoma
TCGA-VS-A94Y	0.394521	1	0.832406	gx	stage iib	Squamous carcinoma
TCGA-VS-A94Z	2.78082	0	-0.131279	g2	stage iib	Squamous carcinoma
TCGA-VS-A950	3.34521	0	0.665432	g3	stage iiia	Squamous carcinoma
TCGA-VS-A952	4.87123	0	0.447394	g2	stage ib1	Adenocarcinoma
TCGA-VS-A953	1.30685	1	0.875377	gx	stage iva	Squamous carcinoma
TCGA-VS-A954	4.69589	0	0.151448	g2	stage iiib	Squamous carcinoma
TCGA-VS-A957	4.62466	0	0.504073	g3	stage ib1	Squamous carcinoma
TCGA-VS-A958	4.17808	0	0.148588	g2	stage iib	Squamous carcinoma
TCGA-VS-A959	4.27671	0	-0.0145278	g3	stage iib	Squamous carcinoma
TCGA-VS-A9U5	4.20548	0	-0.0670615	g3	stage iib	Squamous carcinoma
TCGA-VS-A9U6	3.61644	0	0.509822	gx	stage ivb	Squamous carcinoma
TCGA-VS-A9U7	4.03288	0	0.000186903	g3	stage ib1	Squamous carcinoma
TCGA-VS-A9UB	2.49589	0	-0.311029	g3	stage iib	Squamous carcinoma
TCGA-VS-A9UC	2.26027	0	0.0342813	g2	stage iib	Squamous carcinoma
TCGA-VS-A9UD	2.02466	0	-0.0479523	g2	stage iiia	Squamous carcinoma
TCGA-VS-A9UH	3.90959	0	-0.014414	gx	stage iva	Squamous carcinoma
TCGA-VS-A9UI	3.7589	1	0.682293	gx	stage iib	Squamous carcinoma
TCGA-VS-A9UJ	0.142466	1	0.960279	gx	stage iib	Squamous carcinoma
TCGA-VS-A9UL	1.21096	1	0.711074	g3	stage iiib	Squamous carcinoma
TCGA-VS-A9UM	2.27123	1	-0.0764793	g2	stage ivb	Squamous carcinoma
TCGA-VS-A9UO	3.98904	0	0.400128	g2	stage iib	Adenocarcinoma
TCGA-VS-A9UP	3.95616	0	-0.0765525	g3	stage iia	Adenocarcinoma
TCGA-VS-A9UQ	3.46027	0	-0.564415	g2	stage ib	Adenocarcinoma
TCGA-VS-A9UR	2.1726	0	0.749993	gx	stage iia	Adenocarcinoma
TCGA-VS-A9UT	1.32055	0	-0.351616	g3	stage ib	Adenocarcinoma
TCGA-VS-A9UU	1.21096	0	0.515323	g1	stage iib	Squamous carcinoma
TCGA-VS-A9UV	0.284932	1	0.453639	gx	stage iva	Squamous carcinoma
TCGA-VS-A9UY	1.52055	1	0.486947	g2	stage ivb	Squamous carcinoma
TCGA-VS-A9UZ	5.6	0	0.172067	g2	stage ib1	Adenocarcinoma
TCGA-VS-A9V0	1.56986	0	0.197369	g3	stage ib	Adenocarcinoma
TCGA-VS-A9V1	0.430137	1	0.601898	g2	stage ivb	Adenocarcinoma
TCGA-VS-A9V2	1.52055	0	-0.129953	g2	stage ib1	Squamous carcinoma
TCGA-VS-A9V3	1.47945	0	0.333557	g3	stage ivb	Squamous carcinoma
TCGA-VS-A9V4	0.361644	1	1.31391	g2	stage iva	Adenocarcinoma
TCGA-VS-A9V5	1.35342	1	0.344758	g2	stage iib	Adenocarcinoma
TCGA-VS-AA62	1.28493	1	0.38849	g2	stage iib	Squamous carcinoma
TCGA-WL-A834	2.16712	0	-0.147133	g3	NA	Squamous carcinoma
TCGA-XS-A8TJ	2.43836	0	-0.0160826	g2	stage ib1	Squamous carcinoma
TCGA-ZJ-A8QO	0	0	0.482391	NA	NA	Squamous carcinoma
TCGA-ZJ-A8QQ	5.63288	0	0.673796	gx	stage iib	Squamous carcinoma
TCGA-ZJ-A8QR	1.59452	1	0.695893	gx	stage i	Squamous carcinoma
TCGA-ZJ-AAX4	0.0575342	0	0.170923	g3	stage ii	Squamous carcinoma
TCGA-ZJ-AAX8	0	0	0.264516	g2	stage iiib	Squamous carcinoma
TCGA-ZJ-AAXA	0.117808	0	-0.0189028	g2	stage ib1	Squamous carcinoma
TCGA-ZJ-AAXB	0	0	-0.0552207	g3	stage ib2	Adenocarcinoma
TCGA-ZJ-AAXD	0	0	0.436171	g2	stage iiib	Squamous carcinoma
TCGA-ZJ-AAXF	0	0	0.325563	g3	stage iib	Squamous carcinoma
TCGA-ZJ-AAXI	0	0	0.0851529	g2	stage iib	Squamous carcinoma
TCGA-ZJ-AAXJ	0	0	0.186092	NA	stage iib	Squamous carcinoma
TCGA-ZJ-AAXN	0	0	0.94646	NA	stage ib2	Squamous carcinoma
TCGA-ZJ-AAXT	0	0	0.86778	g2	stage iiib	Squamous carcinoma
TCGA-ZJ-AAXU	0.0136986	0	0.224575	g2	stage iib	Squamous carcinoma
TCGA-ZJ-AB0H	0	0	-0.256623	NA	stage iiib	Squamous carcinoma
TCGA-ZJ-AB0I	0	0	0.920394	NA	stage iib	Squamous carcinoma
TCGA-ZX-AA5X	0.326027	0	0.202891	g2	stage iiib	Squamous carcinoma
